# Supplementary material
Source: PubMed Central journal article supplement (PMC5902639)

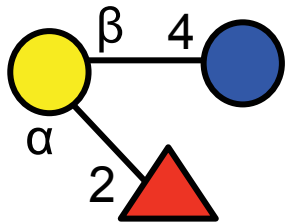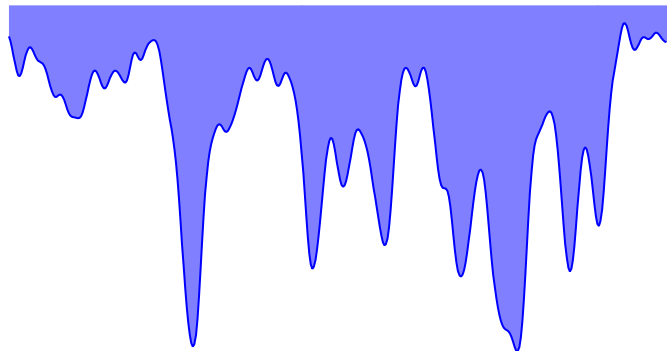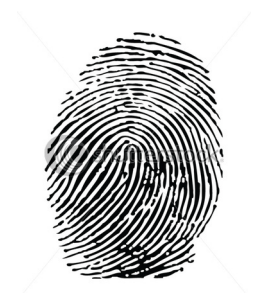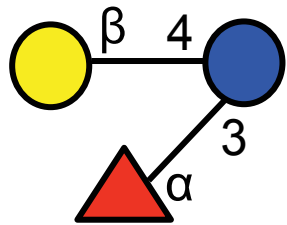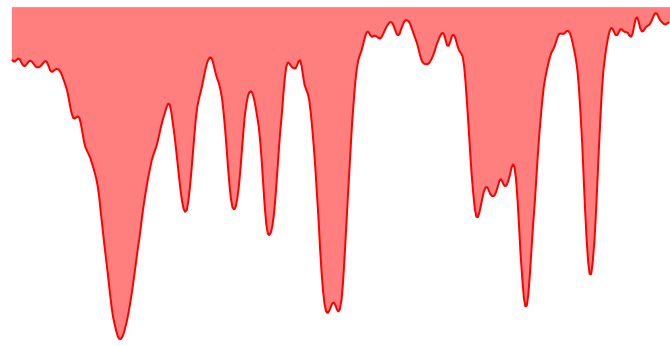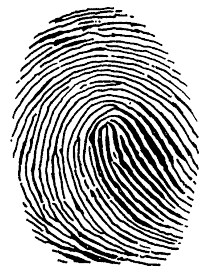

3500 3550 3600 3650 3700  
Infrared wavenumber /  $\text{cm}^{-1}$

Supplement: NIHMS951530-supplement-toc.pdf [file NIHMS951530-supplement-toc.pdf]
